1 **SARS-CoV-2 ORF3b is a potent interferon antagonist whose activity is further**  
2 **increased by a naturally occurring elongation variant**

3

4 Yoriyuki Konno<sup>1†</sup>, Izumi Kimura<sup>1†</sup>, Keiya Uriu<sup>1,2</sup>, Masaya Fukushi<sup>3</sup>, Takashi Irie<sup>3</sup>,  
5 Yoshio Koyanagi<sup>4</sup>, So Nakagawa<sup>5</sup>, Kei Sato<sup>1,6,\*</sup>

6

7 <sup>1</sup>Division of Systems Virology, Department of Infectious Disease Control,  
8 International Research Center for Infectious Diseases, Institute of Medical Science,  
9 the University of Tokyo, Tokyo 1088639, Japan

10 <sup>2</sup>Graduate School of Medicine, the University of Tokyo, Tokyo 1130033, Japan

11 <sup>3</sup>Institute of Biomedical and Health Sciences, Hiroshima University, Hiroshima  
12 7398511, Japan

13 <sup>4</sup>Institute for Frontier Life and Medical Sciences, Kyoto University, Kyoto 6068507,  
14 Japan

15 <sup>5</sup>Department of Molecular Life Science, Tokai University School of Medicine,  
16 Kanagawa 2591193, Japan

17 <sup>6</sup>Lead Contact

18 †These authors contributed equally.

19 \*Correspondence: [ksato@ims.u-tokyo.ac.jp](mailto:ksato@ims.u-tokyo.ac.jp) (K.S.)

20

21 **Conflict of interest:** The authors declare that no competing interests exist.

22 **Short title:** SARS-CoV-2 ORF3b is a potent IFN antagonist

23 **Keywords:** SARS-CoV-2; COVID-19; ORF3b; type I interferon; evolution

24 **Abstract:** 147/150 words

25 **Abstract**

26 One of the features distinguishing SARS-CoV-2 from its more pathogenic  
27 counterpart SARS-CoV is the presence of premature stop codons in its *ORF3b* gene.  
28 Here, we show that SARS-CoV-2 *ORF3b* is a potent interferon antagonist,  
29 suppressing the induction of type I interferon more efficiently than its SARS-CoV  
30 ortholog. Phylogenetic analyses and functional assays revealed that SARS-CoV-2-  
31 related viruses from bats and pangolins also encode truncated *ORF3b* gene  
32 products with strong anti-interferon activity. Furthermore, analyses of more than  
33 15,000 SARS-CoV-2 sequences identified a natural variant, in which a longer  
34 *ORF3b* reading frame was reconstituted. This variant was isolated from two patients  
35 with severe disease and further increased the ability of ORF3b to suppress interferon  
36 induction. Thus, our findings not only help to explain the poor interferon response in  
37 COVID-19 patients, but also describe a possibility of the emergence of natural  
38 SARS-CoV-2 quasispecies with extended *ORF3b* that may exacerbate COVID-19  
39 symptoms.

40

41

42 **Highlights**

- 43 ● ORF3b of SARS-CoV-2 and related bat and pangolin viruses is a potent IFN  
44 antagonist
- 45 ● SARS-CoV-2 ORF3b suppresses IFN induction more efficiently than SARS-CoV  
46 ortholog
- 47 ● The anti-IFN activity of ORF3b depends on the length of its C-terminus
- 48 ● An ORF3b with increased IFN antagonism was isolated from two severe COVID-  
49 19 cases

## 50 Introduction

51 In December 2019, an unusual outbreak of infectious pneumonia was reported in  
52 the city of Wuhan, Hubei, China. A few weeks later, a novel coronavirus (CoV) was  
53 identified as the causative agent and the disease was termed coronavirus disease  
54 2019 (COVID-19) (Zhou et al., 2020). Since this novel virus is phylogenetically  
55 related to severe acute respiratory syndrome (SARS) CoV (SARS-CoV), it was  
56 named SARS-CoV-2. As of May 2020, SARS-CoV-2 causes an ongoing pandemic,  
57 with more than 4 million reported cases and more than 280,000 deaths worldwide  
58 (WHO, 2020).

59 SARS-CoV-2 infection may be asymptomatic or result in flu-like symptoms  
60 such as fever, cough and fatigue (Chen et al., 2020). In some cases, however,  
61 COVID-19 progresses to severe pneumonia and death (Guan et al., 2020; Hui et al.,  
62 2020; Li et al., 2020). Although it is still challenging to assess the morbidity rate of  
63 COVID-19, estimates range from 1.4 to 1.9% in China (Guan et al., 2020; Verity et  
64 al., 2020). This is substantially lower than the morbidity rate of SARS-CoV, which is  
65 about 9.6% (WHO, 2004). SARS-CoV, which frequently causes severe respiratory  
66 symptoms including fatal pneumonia, first emerged in Guangdong, China in 2002  
67 and was stamped out in 2004 [reviewed in (Chan-Yeung and Xu, 2003; Weiss,  
68 2020)]. Until then, 8,096 cases of SARS were reported in 29 countries and territories,  
69 and 774 people died (WHO, 2004). Thus, SARS-CoV is more virulent than SARS-  
70 CoV-2.

71 SARS-CoV-2 and SARS-CoV are phylogenetically closely related, both  
72 belonging to the family *Coronaviridae*, genus *Betacoronavirus* and subgenus  
73 *Sarbecovirus* (Lam et al., 2020; Zhou et al., 2020). Both viruses were transmitted  
74 from animals to humans. Thus, elucidating their zoonotic origin and phylogenetic  
75 history may help to understand genetic and phenotypic differences between SARS-  
76 CoV and SARS-CoV-2. Viruses closely related to SARS-CoV were detected in  
77 Chinese rufous horseshoe bats (*Rhinolophus sinicus*) (Lau et al., 2005; Li et al.,  
78 2005) and palm civets (*Paguma larvata*) (Wang et al., 2005). Subsequent  
79 surveillance studies have identified additional clades of SARS-CoV-related viruses  
80 in various bat species (mainly of the genus *Rhinolophus*) (Ge et al., 2013; He et al.,  
81 2014; Hu et al., 2017a; Lau et al., 2010; Lin et al., 2017; Tang et al., 2006; Wang et  
82 al., 2017; Wu et al., 2016; Yuan et al., 2010), suggesting that zoonotic coronavirus  
83 transmission from horseshoe bats to humans led to the emergence of SARS-CoV.  
84 Similarly, SARS-CoV-2-related viruses were identified in intermediate horseshoe  
85 bats (*Rhinolophus affinis*) (Zhou et al., 2020), the Malayan horseshoe bat  
86 (*Rhinolophus malayanus*) and Malayan pangolins (*Manis javanica*) (Lam et al.,  
87 2020; Xiao et al., 2020). Although it has been suggested that the SARS-CoV-2

88 outbreak has originated from cross-species coronavirus transmission from these  
89 mammals to humans, the exact origin remains to be determined (Andersen et al.,  
90 2020).

91           One prominent feature that distinguishes COVID-19 from SARS in terms of  
92 immune responses is the poor induction of a type I interferon (IFN-I) response by  
93 SARS-CoV-2 compared to SARS-CoV and influenza A virus (IAV) (Blanco-Melo et  
94 al., 2020; Hadjadj et al., 2020). Notably, impaired IFN-I responses are associated  
95 with COVID-19 disease (Hadjadj et al., 2020). However, the molecular mechanisms  
96 underlying the inefficient IFN-I responses in SARS-CoV-2 infection remain unclear.  
97 In this study, we therefore aimed to characterize the viral factor(s) determining  
98 immune activation upon SARS-CoV-2 infection. We particularly focused on  
99 differences in putative viral IFN-I antagonists and revealed that the *ORF3b* gene  
100 products of SARS-CoV-2 and SARS-CoV not only differ considerably in their length,  
101 but also in their ability to antagonize type I IFN. Furthermore, we demonstrate that  
102 the potent anti-IFN-I activity of SARS-CoV-2 ORF3b is also found in related viruses  
103 from bats and pangolins. Mutational analyses revealed that the length of the C-  
104 terminus determines the efficacy of IFN antagonism by ORF3b. Finally, we describe  
105 a natural SARS-CoV-2 variant with further increased ORF3b-mediated anti-IFN-I  
106 activity that emerged during the current COVID-19 pandemic.

## 107 **Results**

### 108 **SARS-CoV-2 ORF3b is a potent IFN-I antagonist**

109 To determine virological differences between SARS-CoV-2 and SARS-CoV, we set  
110 out to compare the sequences of diverse *Sarbecoviruses*. Consistent with recent  
111 reports (Lam et al., 2020; Zhou et al., 2020), *Sarbecoviruses* clustered into two  
112 groups, SARS-CoV-2-related and SARS-CoV-related viruses (**Figure 1A**). A  
113 comparison of individual viral open reading frames (ORFs) revealed that the length  
114 of ORF3b is clearly different between SARS-CoV-2 and SARS-CoV lineages, while  
115 the lengths of all remaining ORFs are relatively constant among *Sarbecoviruses*  
116 (**Figure 1B**). More specifically, the ORF3b sequences of SARS-CoV-2 and related  
117 viruses in bats and pangolins are only 22 amino acids (66 bp) long and therefore  
118 considerably shorter than those of their SARS-CoV orthologs ( $153.2 \pm 0.47$  amino  
119 acids on average).

120 Previous studies on SARS-CoV and related viruses demonstrated that at  
121 least two accessory proteins, ORF3b and ORF6, as well as the nucleocapsid (N,  
122 also known as ORF9a) have the ability to inhibit IFN-I production (Frieman et al.,  
123 2007; Hu et al., 2017b; Kopecky-Bromberg et al., 2007; Zhou et al., 2012). Since the  
124 ORF3b length was remarkably different between SARS-CoV-2 and SARS-CoV  
125 (**Figure 1B**), we hypothesized that the antagonistic activity of ORF3b against IFN-I  
126 differs between these two viruses. To test this hypothesis, we monitored human  
127 *IFNB1* promoter activity in the presence of ORF3b of SARS-CoV-2 (Wuhan-Hu-1)  
128 and SARS-CoV (Tor2) using a luciferase reporter assay. The influenza A virus (IAV)  
129 non-structural protein 1 (NS1) served as positive control (Garcia-Sastre et al., 1998;  
130 Krug et al., 2003). As shown in **Figure 1C**, all three viral proteins dose-dependently  
131 suppressed the activation of the *IFNB1* promoter upon Sendai virus (SeV) infection.  
132 Notably, the antagonistic activity of SARS-CoV-2 ORF3b was slightly, but  
133 significantly higher than that of SARS-CoV ORF3b (**Figure 1C, bottom**). Thus, our  
134 data demonstrate that SARS-CoV-2 ORF3b is a potent inhibitor for human IFN-I  
135 activation, even though it only comprises 22 amino acids.

136

### 137 **SARS-CoV-2-related ORF3b proteins from bat and pangolin viruses suppress** 138 **IFN-I activation on average more efficiently than their SARS-CoV counterparts**

139 Since the lengths of ORF3b proteins in SARS-CoV-2-related viruses including those  
140 from bats and pangolins were on average shorter than those from SARS-CoV and  
141 related viruses (**Figure 1B**), we next investigated whether they were also generally  
142 more efficient in antagonizing IFN-I. A phylogenetic analysis of *Sarbecovirus ORF3b*  
143 genes showed that the evolutionary relationship of *Sarbecovirus ORF3b* genes was  
144 similar to that of the full-length viral genomes (**Figures 1A and 2A**). For our

145 functional analyses, we generated expression plasmids for ORF3b from SARS-CoV-  
146 2-related viruses from bats (RmYN02, RaTG13 and ZXC21) and a pangolin (P4L),  
147 as well as SARS-CoV-related viruses from a civet (civet007) and bats (Rs7327,  
148 Rs4231, YN2013 and Rm1), representing different lengths of this protein (**Figure**  
149 **2B**). As shown in **Figure 2C**, all four SARS-CoV-2-related ORF3b significantly  
150 suppressed human IFN-I activation. In contrast, only two SARS-CoV-related ORF3b  
151 proteins, Rs4231 and Rm1, exhibited anti-IFN-I activity at the concentrations tested  
152 (**Figure 2C**). Intriguingly, these two SARS-CoV-related ORF3b proteins are C-  
153 terminally truncated and shorter than ORF3b of SARS-CoV Tor2 (**Figure 2A**). These  
154 findings suggest that the C-terminal region (residues 115-154) may attenuate the  
155 anti-IFN-I activity of ORF3b. To test this hypothesis, we generated a C-terminally  
156 truncated derivatives of SARS-CoV (Tor2) ORF3b harboring a premature stop codon  
157 at position 135. The K135\* mutant mimics the ORF3b of Rs4231 (**Figure 2B**).  
158 Reporter assays revealed that this derivative exhibits higher anti-IFN-I activity than  
159 wild-type (WT) SARS-CoV ORF3b (**Figure 2D**), demonstrating that the C-terminal  
160 region of SARS-CoV ORF3b indeed attenuates its anti-IFN-I activity.

161

### 162 **A SARS-CoV ORF3b-like sequence is hidden in the SARS-CoV-2 genome**

163 ORF3b of SARS-CoV-2 is shorter than its ortholog in SARS-CoV (**Figures 1B and**  
164 **2A**). However, when closely inspecting the nucleotide sequences of these two  
165 viruses, we noticed that the SARS-CoV-2 nucleotide sequence downstream of the  
166 stop codon of *ORF3b* shows a high similarity to the SARS-CoV *ORF3b* gene  
167 (nucleotide similarity=79.5%; **Figure 3A**). In contrast to SARS-CoV *ORF3b*, however,  
168 SARS-CoV-2 harbors four premature stop codons that result in the expression of a  
169 drastically shortened ORF3b protein (**Figure 3A**). Similar patterns were observed in  
170 SARS-CoV-2-related viruses from bats and pangolins. Since the *ORF3b* length is  
171 closely associated with its anti-IFN-I activity (**Figures 2C and 2D**), we hypothesized  
172 that reversion of the premature stop codons in SARS-CoV-2 *ORF3b* affects its ability  
173 to inhibit human IFN-I. To address this possibility, we generated four SARS-CoV-2  
174 ORF3b derivatives, 57\*, 79\*, 119\* and 155\*, lacking the respective premature stop  
175 codons (**Figure 3B, top**). As shown in **Figure 3C**, all four derivatives inhibited human  
176 IFN-I activation in dose-dependent manners. Consistent with the results obtained  
177 with SARS-CoV ORF3b mutants (**Figure 2D**), the 155\* mutant, comprising the very  
178 C-terminal region (positions 119-154), was poorly expressed and exhibited relatively  
179 low anti-IFN-I activity (**Figure 3C**). Notably, however, we found that the extended  
180 ORF3b derivatives, particularly 57\*, 79\*, 119\*, exhibited higher anti-IFN-I activity  
181 compared to WT ORF3b (**Figure 3C**). These findings confirm that the length of  
182 ORF3b determines its ability to suppress an IFN-I response. Furthermore, they show

183 that the loss of authentic *ORF3b* stop codon during the current SARS-CoV-2  
184 pandemic may result in the emergence of viral variants with enhanced IFN-I-  
185 antagonistic activity.

186

### 187 **Characterization of a natural SARS-CoV-2 ORF3b variant with enhanced anti-** 188 **IFN-I activity**

189 By screening >15,000 viral sequences deposited in GISAID (<https://www.gisaid.org>;  
190 as of 22 April, 2020) using the CoV-GLUE webtool (<http://cov-glue.cvr.gla.ac.uk>), we  
191 detected two viral sequences (accession IDs: EPI\_ISL\_422564 and  
192 EPI\_ISL\_422565), in which the *ORF3b* gene was extended due to the loss of the  
193 first premature stop codon (\*23Q) (**Figure 3B, bottom**). The similarity of the full-  
194 length sequences of these two viruses, which were collected from COVID-19  
195 patients in Ecuador, were >99.6%, and the *ORF3b* sequences were identical. Apart  
196 from the \*23Q mutation, the “Ecuador variant” also harbored an L24M change  
197 compared to the SARS-CoV *ORF3b*-like sequence in SARS-CoV-2 [Wuhan-Hu-1  
198 (accession no. NC\_045512.2), nucleotides 25814-26281] (**Figure 3B, bottom**).  
199 IFN $\beta$  reporter assays revealed that the “Ecuador variant” *ORF3b* exhibits  
200 significantly higher anti-IFN-I activity than the parental SARS-CoV-2 *ORF3b* (**Figure**  
201 **3D**). These findings show that a naturally occurring SARS-CoV-2 variant, expressing  
202 an elongated *ORF3b* protein with enhanced anti-IFN activity, has already emerged  
203 during the current SARS-CoV-2 pandemic.

## 204 Discussion

205 Here, we demonstrate that SARS-CoV-2 ORF3b is a potent antagonist of human  
206 IFN-I activation. On average, ORF3b proteins from SARS-CoV-2 and related bat and  
207 pangolin viruses were more active than their SARS-CoV counterparts. Notably, a  
208 recent study has revealed that the antibodies recognizing ORF3b are highly  
209 detectable during the early phase of SARS-CoV-2 infection (Hachim et al., 2020),  
210 which suggests that ORF3b is one of the viral proteins dominantly expressed in the  
211 COVID-19 patients during acute infection. Therefore, our findings may help to  
212 explain the inefficient and delayed IFN-I responses in SARS-CoV-2-infected cells as  
213 well as COVID-19 patients (Blanco-Melo et al., 2020). Moreover, a recent study  
214 showed that impaired IFN-I responses as well as reduced IFN-stimulated gene  
215 expression are associated with severe COVID-19 disease (Hadjadj et al., 2020). This  
216 suggests that imbalanced IFN-I responses against SARS-CoV-2 infection may  
217 determine its pathogenicity and explain differences compared to SARS-CoV. Thus,  
218 it is tempting to speculate that atypical symptoms and poor IFN-I responses in  
219 SARS-CoV-2 infection may be attributed to the potent anti IFN-I activity of its ORF3b.

220 Like SARS-CoV-2 *ORF3b*, its orthologs in SARS-CoV-2-related viruses  
221 from bats and pangolins efficiently antagonize IFN-I and are generally truncated due  
222 to the presence of several premature stop codons. In contrast, the anti-IFN activity  
223 of ORF3b proteins encoded by some SARS-CoV-related viruses is attenuated, most  
224 likely due to an elongated C-terminus. We hypothesized that the *ORF3b* length  
225 variation in SARS-CoV-like viruses may be the result of recombination events. In line  
226 with this, *Sarbecoviruses* seem to easily recombine with each other (Andersen et al.,  
227 2020; Lam et al., 2020; Zhou et al., 2020), and some horseshoe bat species such  
228 as *Rhinolophus affinis* and *Rhinolophus sinicus* are known to harbor both SARS-  
229 CoV-2- and SARS-CoV-related viruses (Andersen et al., 2020; Zhou et al., 2020).  
230 Nevertheless, the phylogenetic topologies of the full-length viral genome and the  
231 *ORF3b* gene are similar, and we found no evidence for recombination of *ORF3b*  
232 between the lineages of SARS-CoV-2 and SARS-CoV. Notably, phenotypic  
233 differences in the ability of ORF3b to suppress IFN-I responses may also be  
234 associated with the likelihood of successful zoonotic transmission of *Sarbecoviruses*  
235 to humans since many IFN-stimulated genes are antagonized in a species-specific  
236 manner. While more than 50 SARS-CoV-related viruses were isolated from bats (Ge  
237 et al., 2013; He et al., 2014; Hu et al., 2017a; Lau et al., 2010; Lau et al., 2005; Li et  
238 al., 2005; Lin et al., 2017; Tang et al., 2006; Wang et al., 2017; Wu et al., 2016; Yuan  
239 et al., 2010), only eight viral sequences belonging to the SARS-CoV-2 lineage were  
240 detected so far (Andersen et al., 2020; Lam et al., 2020; Xiao et al., 2020; Zhou et  
241 al., 2020). Thus, further investigations are needed to elucidate the dynamics of



242 cross-species transmission events of *Sarbecoviruses* and the evolution of the  
243 *ORF3b* gene.

244 We further show that a SARS-CoV *ORF3b*-like sequence is still present in  
245 the SARS-CoV-2 genome, but is interrupted by premature stop codons. We  
246 demonstrate that a partial extension of SARS-CoV-2 *ORF3b* by reverting stop  
247 codons increases its inhibitory activity against human IFN-I. Full reversion of all stop  
248 codons, however, resulted in an *ORF3b* protein with poor anti-IFN activity. This is in  
249 line with the phenotypic difference between SARS-CoV-2 and SARS-CoV *ORF3b*  
250 proteins and suggests that the very C-terminus of *ORF3b* impairs its immune  
251 evasion activity.

252 Intriguingly, we also identified a naturally occurring SARS-CoV-2 *ORF3b*  
253 variant that expresses an elongated protein due to the loss of the first premature  
254 stop codon. This variant suppresses IFN-I even more efficiently than *ORF3b* of the  
255 SARS-CoV-2 reference strain. In agreement with an association of IFN suppression  
256 with disease severity (Hadjadj et al., 2020), the two patients in Ecuador harboring  
257 SARS-CoV-2 with the extended *ORF3b* variant were critically ill; one (accession ID:  
258 EPI\_ISL\_422564) was treated in an intensive care unit and the other (accession ID:  
259 EPI\_ISL\_422565) died of COVID-19 (unpublished information from Dr. Paúl  
260 Cárdenas, Universidad San Francisco de Quito, Quito, Ecuador). There are no direct  
261 evidence indicating that the viruses detected in these two COVID-19 patients in  
262 Ecuador are highly pathogenic. However, based on our experimental results, it might  
263 be plausible to assume that naturally occurring length variants of *ORF3b* may occur  
264 due to the loss of premature stop codons and potentially contribute to the emergence  
265 of highly pathogenic SARS-CoV-2 quasispecies. Our findings can be a clue to  
266 monitor the possibility of the emergence of highly pathogenic viruses during current  
267 SARS-CoV-2 pandemic.

## 268 **Materials and Methods**

### 269 **Cell Culture**

270 HEK293 cells (a human embryonic kidney cell line; ATCC CRL-1573) were  
271 maintained in Dulbecco's modified Eagle's medium (Sigma-Aldrich) containing fetal  
272 calf serum and antibiotics.

273

### 274 **Viral Genomes and Phylogenetic Analyses**

275 All viral genome sequences used in this study and the respective GenBank or  
276 GISAID (<https://www.gisaid.org>) accession numbers are summarized in **Table S1**.  
277 We first aligned the viral genomes using the L-INS-i program of MAFFT version  
278 7.453 (Kato and Standley, 2013). Based on the multiple sequence alignment and  
279 the gene annotation of SARS-CoV, we extracted the region of the *ORF3b* gene. We  
280 then constructed phylogenetic trees using the full-length genomes (**Figures 1A and**  
281 **S1**) and *ORF3b* gene (**Figure 2A**). We generated a maximum likelihood based  
282 phylogenetic tree using RAxML-NG (Kozlov et al., 2019) with a General Time  
283 Reversible model of nucleotide substitution with invariant sites and gamma  
284 distributed rate variation among sites. We visualized the tree using a FigTree  
285 software (<http://tree.bio.ed.ac.uk/software/figtree>).

286

### 287 **Plasmid Construction**

288 To construct the expression plasmids for HA-tagged *Sarbecovirus* ORF3b and IAV  
289 A/Puerto Rico/8/34 (H1N1 PR8; accession no. EF467817.1) NS1, pCAGGS (Niwa  
290 et al., 1991) was used as a backbone. The HA-tagged ORF of each gene (the  
291 accession numbers and sequences are listed in **Table S2**) and the cryptic SARS-  
292 CoV *ORF3b*-like sequence in SARS-CoV-2 [Wuhan-Hu-1 (accession no.  
293 NC\_045512.2), nucleotides 25814-26281) was synthesized by a gene synthesis  
294 service (Fasmac). The ORF3b derivatives were generated by PCR using  
295 PrimeSTAR GXL DNA polymerase (Takara), the synthesized ORFs as templates,  
296 and the primers listed in **Table S3**. The HA-tagged "Ecuador variant" ORF3b  
297 (accession IDs: EPI\_ISL\_422564 and EPI\_ISL\_422565, which corresponds to the  
298 S23Q/L24M mutant of SARS-CoV-2 Wuhan-Hu-1 ORF3b \*57) was generated by  
299 overlap extension PCR by using PrimeSTAR GXL DNA polymerase (Takara), the  
300 SARS-CoV-2 ORF3b 155\* as the template, and the primers listed in **Table S3**. The  
301 obtained DNA fragments were inserted into pCAGGS via EcoRI-BglIII or XhoI-BglIII.  
302 Nucleotide sequences were determined by a DNA sequencing service (Fasmac),  
303 and the sequence data were analyzed by Sequencher v5.1 software (Gene Codes  
304 Corporation).

305

### 306 **Transfection, SeV Infection and Reporter Assay**

307 HEK293 cells were transfected using PEI Max (Polysciences) according to the  
308 manufacturer's protocol. For luciferase reporter assay, cells were cotransfected with  
309 500 ng of p125Luc (expressing firefly luciferase driven by human *IFNB1* promoter;  
310 kindly provided by Dr. Takashi Fujita) (Fujita et al., 1993) and the pCAGGS-based  
311 HA-tagged expression plasmid (the amounts are indicated in the figure legends). At  
312 24 h posttransfection, SeV (strain Cantell, clone cCdi; accession no. AB855654)  
313 (Yoshida et al., 2018) was inoculated into the transfected cells at multiplicity of  
314 infection (MOI) 10. The luciferase reporter assay was performed as described  
315 (Kobayashi et al., 2014; Konno et al., 2018; Ueda et al., 2017). Briefly, 50  $\mu$ l of cell  
316 lysate was applied to a 96-well plate (Nunc), and the firefly luciferase activity was  
317 measured using a BrillianStar-LT assay system (Toyo-b-net), and the input for the  
318 luciferase assay was normalized by using a CellTiter-Glo 2.0 assay kit (Promega)  
319 following the manufacturers' instructions. For this assay, a 2030 ARVO X multilabel  
320 counter instrument (PerkinElmer) was used.

321

### 322 **Western Blotting**

323 Western blotting was performed as described (Kobayashi et al., 2014; Konno et al.,  
324 2018; Nakano et al., 2017; Yamada et al., 2018) using an HRP-conjugated anti-HA  
325 rat monoclonal antibody (clone 3F10; Roche) and an anti-alpha-tubulin (TUBA)  
326 mouse monoclonal antibody (clone DM1A; Sigma-Aldrich). Transfected cells were  
327 lysed with RIPA buffer (25 mM HEPES [pH 7.4], 50 mM NaCl, 1 mM MgCl<sub>2</sub>, 50  $\mu$ M  
328 ZnCl<sub>2</sub>, 10% glycerol, 1% Triton X-100) containing a protease inhibitor cocktail  
329 (Roche).

330

### 331 **CoV-GLUE**

332 To survey the *ORF3b* derivatives in pandemic SARS-CoV-2 sequences, we used  
333 the 15,605 viral sequences deposited in GISAID (<https://www.gisaid.org>) (accessed  
334 22 April, 2020). The screening was performed using the CoV-GLUE platform  
335 (<http://cov-glue.cvr.gla.ac.uk>) developed by MRC-University of Glasgow Centre for  
336 Virus Research, Scotland, UK (accessed 22 April, 2020). Using CoV-GLUE, we  
337 detected the two SARS-CoV-2 sequences (accession IDs: EPI\_ISL\_422564 and  
338 EPI\_ISL\_422565, collected in Ecuador) possessing the V163T/T164N substitutions  
339 in ORF3a, which correspond to the \*23Q/L24M/57\* substitutions in ORF3b.

340

### 341 **Statistical Analysis**

342 Data analyses were performed using Prism 7 (GraphPad Software). The data are  
343 presented as averages  $\pm$  SEM. Statistically significant differences were determined

344 by Student's  $t$  test. Statistical details can be found directly in the figures or in the  
345 corresponding figure legends.

346 **Author Contributions**

347 Y.Konno, I.K., K.U., and T.I. performed the experiments.

348 S.N. performed molecular phylogenetic analysis.

349 T.I. and Y.Koyanagi prepared reagents.

350 Y.Konno, I.K., T.I. and K.S. interpreted the results.

351 K.S. designed the experiments and wrote the manuscript.

352 All authors reviewed and proofread the manuscript.

353

354 **Acknowledgments**

355 We would like to thank all laboratory members in Division of Systems Virology,  
356 Institute of Medical Science, the University of Tokyo, Japan, and all the authors who  
357 have kindly deposited and shared genome data on GISAID. We also thank Naoko  
358 Misawa, Masayuki Horie and Keizo Tomonaga (Institute for Life and Medical  
359 Sciences, Kyoto University, Japan) and Ryoko Kawabata (Institute of Biomedical  
360 and Health Sciences, Hiroshima University, Japan) for generous supports, Daniel  
361 Sauter (Ulm University, Germany) for providing critical comments and suggestions  
362 for this study, Ken Maeda (National Institute of Infectious Diseases, Japan) for  
363 providing BKT1 cells, and Takashi Fujita (Institute for Life and Medical Sciences,  
364 Kyoto University, Japan) for providing p125Luc. We would like to appreciate Paúl  
365 Cárdenas (Universidad San Francisco de Quito, Ecuador) for providing the clinical  
366 information of the two COVID-19 patients in Ecuador. We thank Kotubu Misawa for  
367 dedicated support.

368 This study was supported in part by AMED Research Program on Emerging  
369 and Re-emerging Infectious Diseases 20fk0108146h0001 (to K.S.); AMED  
370 Research Program on HIV/AIDS 19fk0410019h0003 (to Y.Koyanagi and K.S.) and  
371 20fk0410014h0003 (to Y.Koyanagi and K.S.); KAKENHI Grant-in-Aid for Scientific  
372 Research B 18H02662 (to Y.S. and K.S.), KAKENHI Grant-in-Aid for Scientific  
373 Research on Innovative Areas 16H06429 (to S.N., T.I., and K.S.), 16K21723 (to S.N.,  
374 T.I., and K.S.), 17H05823 (to S.N.), 17H05813 (to K.S.), 19H04837 (to T.I.),  
375 19H04843 (to S.N.) and 19H04826 (to K.S.), and Fund for the Promotion of Joint  
376 International Research (Fostering Joint International Research) 18KK0447 (to K.S.);  
377 JSPS Research Fellow DC1 19J22914 (to Y.Konno), DC1 19J20488 (to I.K.);  
378 Takeda Science Foundation (to K.S.); ONO Medical Research Foundation (to K.S.);  
379 Ichiro Kanehara Foundation (to K.S.); Lotte Foundation (to K.S.); Mochida Memorial  
380 Foundation for Medical and Pharmaceutical Research (to K.S.); Daiichi Sankyo  
381 Foundation of Life Science (to K.S.); Sumitomo Foundation (to K.S.); Uehara  
382 Foundation (to K.S.); Joint Research Project of the Institute of Medical Science, the  
383 University of Tokyo (to Y.Koyanagi); Joint Usage/Research Center program of

- 384 Institute for Frontier Life and Medical Sciences, Kyoto University (to K.S.); and JSPS  
385 Core-to-Core program (A. Advanced Research Networks) (to Y.Koyanagi and K.S.).

## 386 **References**

- 387 Andersen, K.G., Rambaut, A., Lipkin, W.I., Holmes, E.C., and Garry, R.F. (2020).  
388 The proximal origin of SARS-CoV-2. *Nat Med* 26, 450-452.
- 389 Blanco-Melo, D., Nilsson-Payant, B.E., Liu, W.-C., Uhl, S., Hoagland, D., Møller, R.,  
390 Jordan, T.X., Oishi, K., Panis, M., Sachs, D., *et al.* (2020). Imbalanced host response  
391 to SARS-CoV-2 drives development of COVID-19. *Cell in press*.
- 392 Chan-Yeung, M., and Xu, R.H. (2003). SARS: epidemiology. *Respirology* 8 *Suppl*,  
393 S9-14.
- 394 Chen, N., Zhou, M., Dong, X., Qu, J., Gong, F., Han, Y., Qiu, Y., Wang, J., Liu, Y.,  
395 Wei, Y., *et al.* (2020). Epidemiological and clinical characteristics of 99 cases of 2019  
396 novel coronavirus pneumonia in Wuhan, China: a descriptive study. *Lancet* 395,  
397 507-513.
- 398 Frieman, M., Yount, B., Heise, M., Kopecky-Bromberg, S.A., Palese, P., and Baric,  
399 R.S. (2007). Severe acute respiratory syndrome coronavirus ORF6 antagonizes  
400 STAT1 function by sequestering nuclear import factors on the rough endoplasmic  
401 reticulum/Golgi membrane. *J Virol* 81, 9812-9824.
- 402 Fujita, T., Nolan, G.P., Liou, H.C., Scott, M.L., and Baltimore, D. (1993). The  
403 candidate proto-oncogene bcl-3 encodes a transcriptional coactivator that activates  
404 through NF-kappa B p50 homodimers. *Genes Dev* 7, 1354-1363.
- 405 Garcia-Sastre, A., Egorov, A., Matassov, D., Brandt, S., Levy, D.E., Durbin, J.E.,  
406 Palese, P., and Muster, T. (1998). Influenza A virus lacking the NS1 gene replicates  
407 in interferon-deficient systems. *Virology* 252, 324-330.
- 408 Ge, X.Y., Li, J.L., Yang, X.L., Chmura, A.A., Zhu, G., Epstein, J.H., Mazet, J.K., Hu,  
409 B., Zhang, W., Peng, C., *et al.* (2013). Isolation and characterization of a bat SARS-  
410 like coronavirus that uses the ACE2 receptor. *Nature* 503, 535-538.
- 411 Guan, W.J., Ni, Z.Y., Hu, Y., Liang, W.H., Ou, C.Q., He, J.X., Liu, L., Shan, H., Lei,  
412 C.L., Hui, D.S.C., *et al.* (2020). Clinical characteristics of coronavirus disease 2019  
413 in China. *N Engl J Med* 382, 1708-1720.
- 414 Hachim, A., Kavian, N., Cohen, C.A., Chin, A.W., Chu, D.K., Mok, C.K.P., Tsang,  
415 O.T., Yeung, Y.C., Perera, R.A., Poon, L.L., *et al.* (2020). Beyond the Spike:  
416 identification of viral targets of the antibody response to SARS-CoV-2 in COVID-19  
417 patients. *MedRxiv*, 20085670.
- 418 Hadjadj, J., Yatim, N., Barnabei, L., Corneau, A., Boussier, J., Pere, H., Charbit, B.,  
419 Bondet, V., Chenevier-Gobeaux, C., Breillat, P., *et al.* (2020). Impaired type I  
420 interferon activity and exacerbated inflammatory responses in severe Covid-19  
421 patients. *MedRxiv*, 20068015.
- 422 He, B., Zhang, Y., Xu, L., Yang, W., Yang, F., Feng, Y., Xia, L., Zhou, J., Zhen, W.,  
423 Feng, Y., *et al.* (2014). Identification of diverse alphacoronaviruses and genomic

424 characterization of a novel severe acute respiratory syndrome-like coronavirus from  
425 bats in China. *J Virol* 88, 7070-7082.

426 Hu, B., Zeng, L.P., Yang, X.L., Ge, X.Y., Zhang, W., Li, B., Xie, J.Z., Shen, X.R.,  
427 Zhang, Y.Z., Wang, N., *et al.* (2017a). Discovery of a rich gene pool of bat SARS-  
428 related coronaviruses provides new insights into the origin of SARS coronavirus.  
429 *PLoS Pathog* 13, e1006698.

430 Hu, Y., Li, W., Gao, T., Cui, Y., Jin, Y., Li, P., Ma, Q., Liu, X., and Cao, C. (2017b).  
431 The severe acute respiratory syndrome coronavirus nucleocapsid inhibits type I  
432 interferon production by interfering with TRIM25-mediated RIG-I ubiquitination. *J*  
433 *Virol* 91.

434 Hui, D.S., E, I.A., Madani, T.A., Ntoumi, F., Kock, R., Dar, O., Ippolito, G., McHugh,  
435 T.D., Memish, Z.A., Drosten, C., *et al.* (2020). The continuing 2019-nCoV epidemic  
436 threat of novel coronaviruses to global health - The latest 2019 novel coronavirus  
437 outbreak in Wuhan, China. *Int J Infect Dis* 91, 264-266.

438 Katoh, K., and Standley, D.M. (2013). MAFFT multiple sequence alignment software  
439 version 7: improvements in performance and usability. *Mol Biol Evol* 30, 772-780.

440 Kobayashi, T., Takeuchi, J.S., Ren, F., Matsuda, K., Sato, K., Kimura, Y., Misawa,  
441 N., Yoshikawa, R., Nakano, Y., Yamada, E., *et al.* (2014). Characterization of red-  
442 capped mangabey tetherin: implication for the co-evolution of primates and their  
443 lentiviruses. *Sci Rep* 4, 5529.

444 Konno, Y., Nagaoka, S., Kimura, I., Takahashi Ueda, M., Kumata, R., Ito, J.,  
445 Nakagawa, S., Kobayashi, T., Koyanagi, Y., and Sato, K. (2018). A naturally  
446 occurring feline APOBEC3 variant that loses anti-lentiviral activity by lacking two  
447 amino acid residues. *J Gen Virol* 99, 704-709.

448 Kopecky-Bromberg, S.A., Martinez-Sobrido, L., Frieman, M., Baric, R.A., and Palese,  
449 P. (2007). Severe acute respiratory syndrome coronavirus open reading frame  
450 (ORF) 3b, ORF 6, and nucleocapsid proteins function as interferon antagonists. *J*  
451 *Virol* 81, 548-557.

452 Kozlov, A.M., Darriba, D., Flouri, T., Morel, B., and Stamatakis, A. (2019). RAxML-  
453 NG: a fast, scalable and user-friendly tool for maximum likelihood phylogenetic  
454 inference. *Bioinformatics* 35, 4453-4455.

455 Krug, R.M., Yuan, W., Noah, D.L., and Latham, A.G. (2003). Intracellular warfare  
456 between human influenza viruses and human cells: the roles of the viral NS1 protein.  
457 *Virology* 309, 181-189.

458 Lam, T.T., Shum, M.H., Zhu, H.C., Tong, Y.G., Ni, X.B., Liao, Y.S., Wei, W., Cheung,  
459 W.Y., Li, W.J., Li, L.F., *et al.* (2020). Identifying SARS-CoV-2 related coronaviruses  
460 in Malayan pangolins. *Nature*.

461 Lau, S.K., Li, K.S., Huang, Y., Shek, C.T., Tse, H., Wang, M., Choi, G.K., Xu, H.,



- 462 Lam, C.S., Guo, R., *et al.* (2010). Ecoepidemiology and complete genome  
463 comparison of different strains of severe acute respiratory syndrome-related  
464 Rhinolophus bat coronavirus in China reveal bats as a reservoir for acute, self-  
465 limiting infection that allows recombination events. *J Virol* *84*, 2808-2819.
- 466 Lau, S.K., Woo, P.C., Li, K.S., Huang, Y., Tsoi, H.W., Wong, B.H., Wong, S.S.,  
467 Leung, S.Y., Chan, K.H., and Yuen, K.Y. (2005). Severe acute respiratory syndrome  
468 coronavirus-like virus in Chinese horseshoe bats. *Proc Natl Acad Sci U S A* *102*,  
469 14040-14045.
- 470 Li, Q., Guan, X., Wu, P., Wang, X., Zhou, L., Tong, Y., Ren, R., Leung, K.S.M., Lau,  
471 E.H.Y., Wong, J.Y., *et al.* (2020). Early transmission dynamics in Wuhan, China, of  
472 novel coronavirus-infected pneumonia. *N Engl J Med* *382*, 1199-1207.
- 473 Li, W., Shi, Z., Yu, M., Ren, W., Smith, C., Epstein, J.H., Wang, H., Crameri, G., Hu,  
474 Z., Zhang, H., *et al.* (2005). Bats are natural reservoirs of SARS-like coronaviruses.  
475 *Science* *310*, 676-679.
- 476 Lin, X.D., Wang, W., Hao, Z.Y., Wang, Z.X., Guo, W.P., Guan, X.Q., Wang, M.R.,  
477 Wang, H.W., Zhou, R.H., Li, M.H., *et al.* (2017). Extensive diversity of coronaviruses  
478 in bats from China. *Virology* *507*, 1-10.
- 479 Nakano, Y., Misawa, N., Juarez-Fernandez, G., Moriwaki, M., Nakaoka, S., Funo,  
480 T., Yamada, E., Soper, A., Yoshikawa, R., Ebrahimi, D., *et al.* (2017). Correction:  
481 HIV-1 competition experiments in humanized mice show that APOBEC3H imposes  
482 selective pressure and promotes virus adaptation. *PLoS Pathog* *13*, e1006606.
- 483 Niwa, H., Yamamura, K., and Miyazaki, J. (1991). Efficient selection for high-  
484 expression transfectants with a novel eukaryotic vector. *Gene* *108*, 193-199.
- 485 Tang, X.C., Zhang, J.X., Zhang, S.Y., Wang, P., Fan, X.H., Li, L.F., Li, G., Dong,  
486 B.Q., Liu, W., Cheung, C.L., *et al.* (2006). Prevalence and genetic diversity of  
487 coronaviruses in bats from China. *J Virol* *80*, 7481-7490.
- 488 Ueda, M.T., Kurosaki, Y., Izumi, T., Nakano, Y., Oloniniyi, O.K., Yasuda, J.,  
489 Koyanagi, Y., Sato, K., and Nakagawa, S. (2017). Functional mutations in spike  
490 glycoprotein of Zaire ebolavirus associated with an increase in infection efficiency.  
491 *Genes Cells* *22*, 148-159.
- 492 Verity, R., Okell, L.C., Dorigatti, I., Winskill, P., Whittaker, C., Imai, N., Cuomo-  
493 Dannenburg, G., Thompson, H., Walker, P.G.T., Fu, H., *et al.* (2020). Estimates of  
494 the severity of coronavirus disease 2019: a model-based analysis. *Lancet Infect Dis*.
- 495 Wang, L., Fu, S., Cao, Y., Zhang, H., Feng, Y., Yang, W., Nie, K., Ma, X., and Liang,  
496 G. (2017). Discovery and genetic analysis of novel coronaviruses in least horseshoe  
497 bats in southwestern China. *Emerg Microbes Infect* *6*, e14.
- 498 Wang, M., Yan, M., Xu, H., Liang, W., Kan, B., Zheng, B., Chen, H., Zheng, H., Xu,  
499 Y., Zhang, E., *et al.* (2005). SARS-CoV infection in a restaurant from palm civet.

500 Emerg Infect Dis 11, 1860-1865.  
501 Weiss, S.R. (2020). Forty years with coronaviruses. J Exp Med 217.  
502 WHO (2004). "Summary of probable SARS cases with onset of illness from 1  
503 November 2002 to 31 July 2003".  
504 [https://www.who.int/csr/sars/country/table2004\\_04\\_21/en/](https://www.who.int/csr/sars/country/table2004_04_21/en/).  
505 WHO (2020). "Coronavirus disease 2019".  
506 <https://www.who.int/emergencies/diseases/novel-coronavirus-2019>.  
507 Wu, Z., Yang, L., Ren, X., Zhang, J., Yang, F., Zhang, S., and Jin, Q. (2016). ORF8-  
508 related genetic evidence for Chinese horseshoe bats as the source of human severe  
509 acute respiratory syndrome coronavirus. J Infect Dis 213, 579-583.  
510 Xiao, K., Zhai, J., Feng, Y., Zhou, N., Zhang, X., Zou, J.-J., Li, N., Guo, Y., Li, X.,  
511 Shen, X., *et al.* (2020). Isolation of SARS-CoV-2-related coronavirus from Malayan  
512 pangolins. Nature *in press*.  
513 Yamada, E., Nakaoka, S., Klein, L., Reith, E., Langer, S., Hopfensperger, K., Iwami,  
514 S., Schreiber, G., Kirchhoff, F., Koyanagi, Y., *et al.* (2018). Human-specific  
515 adaptations in Vpu conferring anti-tetherin activity are critical for efficient early HIV-  
516 1 replication *in vivo*. Cell Host Microbe 23, 110-120 e117.  
517 Yoshida, A., Kawabata, R., Honda, T., Sakai, K., Ami, Y., Sakaguchi, T., and Irie, T.  
518 (2018). A Single Amino Acid Substitution within the Paramyxovirus Sendai Virus  
519 Nucleoprotein Is a Critical Determinant for Production of Interferon-Beta-Inducing  
520 Copyback-Type Defective Interfering Genomes. J Virol 92.  
521 Yuan, J., Hon, C.C., Li, Y., Wang, D., Xu, G., Zhang, H., Zhou, P., Poon, L.L., Lam,  
522 T.T., Leung, F.C., *et al.* (2010). Intraspecies diversity of SARS-like coronaviruses in  
523 Rhinolophus sinicus and its implications for the origin of SARS coronaviruses in  
524 humans. J Gen Virol 91, 1058-1062.  
525 Zhou, P., Li, H., Wang, H., Wang, L.F., and Shi, Z. (2012). Bat severe acute  
526 respiratory syndrome-like coronavirus ORF3b homologues display different  
527 interferon antagonist activities. J Gen Virol 93, 275-281.  
528 Zhou, P., Yang, X.L., Wang, X.G., Hu, B., Zhang, L., Zhang, W., Si, H.R., Zhu, Y.,  
529 Li, B., Huang, C.L., *et al.* (2020). A pneumonia outbreak associated with a new  
530 coronavirus of probable bat origin. Nature 579, 270-273.  
531  
532

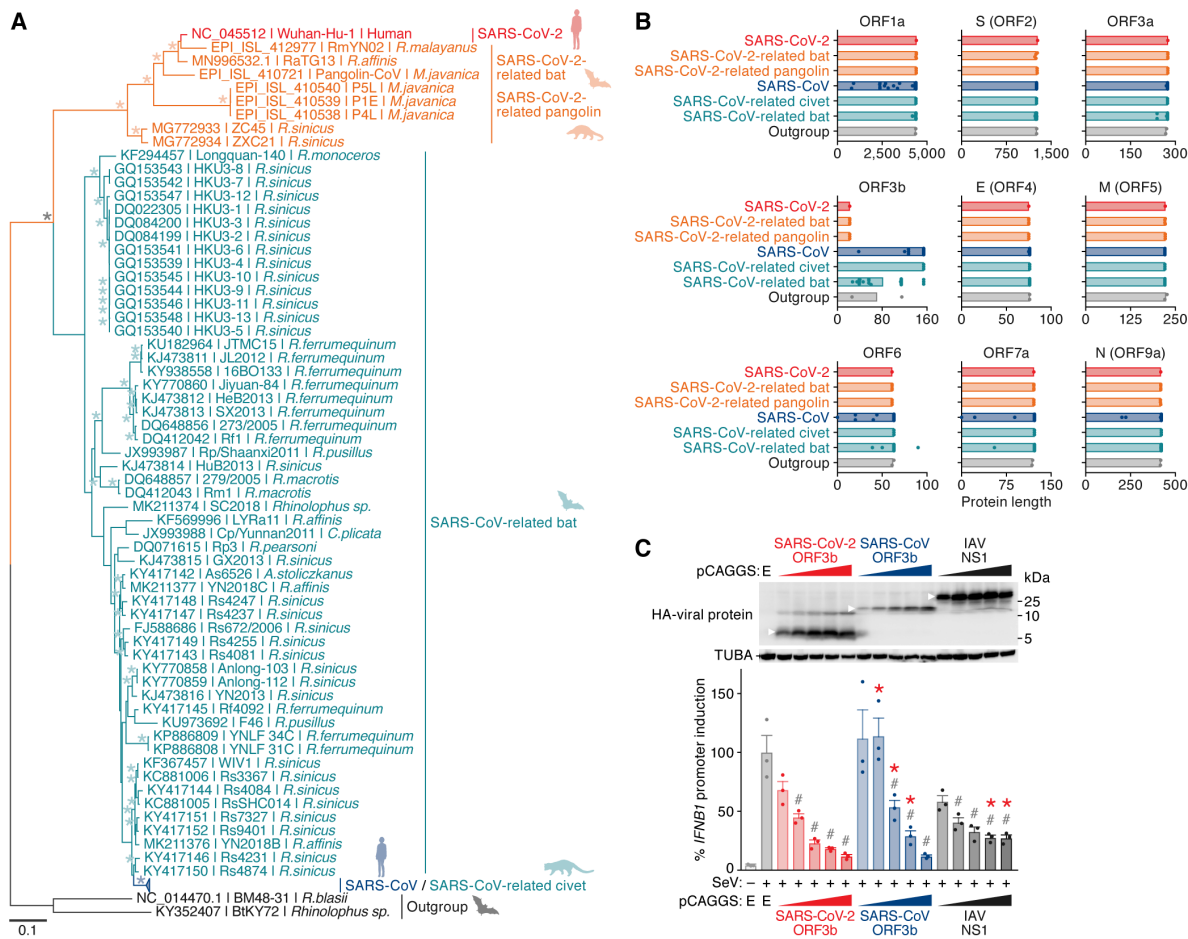

533

## 534 Figure 1. SARS-CoV-2 ORF3b is a potent IFN-I antagonist

535 (A) Maximum likelihood phylogenetic tree of full-length *Sarbecovirus* sequences.  
536 The full-length sequences (~30,000 bp) of SARS-CoV-2 (Wuhan-Hu-1 as a  
537 representative), SARS-CoV-2-related viruses from bats (n=4) and pangolins (n=4),  
538 SARS-CoV (n=190), SARS-CoV-related viruses from civets (n=3) and bats (n=54),  
539 and outgroup viruses (n=2; BM48-31 and BtKY72) were analyzed. Accession  
540 number, strain name, and host of each virus are indicated for each branch. Note that  
541 the branches including SARS-CoV (n=190) and SARS-CoV-related viruses from  
542 civets (n=3) were collapsed for better visualization. The uncollapsed tree is shown  
543 in **Figure S1**, and the sequences used are summarized in **Table S1**. Asterisks  
544 indicate bootstrap values >95%. A scale bar indicates 0.1 nucleotide substitutions  
545 per site. NA, not applicable.

546 (B) Comparison of the protein lengths of *Sarbecovirus* ORFs. The amino acid  
547 numbers of ORF1a, S (ORF2), ORF3a, ORF3b, E (ORF4), M (ORF5), ORF6,  
548 ORF7a, and N (ORF9a) of *Sarbecoviruses* are shown. The viral sequences used  
549 correspond to those in **A**. Bars indicate average values, and each dot represents  
550 one viral strain. ORFs with low similarity (e.g., ORF8 and ORF9b) were excluded

551 from this analysis.

552 **(C)** Potent anti-IFN-I activity of SARS-CoV-2 ORF3b. HEK293 cells were  
553 cotransfected with five different amounts of plasmids expressing HA-tagged SARS-  
554 CoV-2 ORF3b, SARS-CoV ORF3b, and IAV NS1 (50, 100, 200, 300, and 500 ng)  
555 and p125Luc, a plasmid encoding firefly luciferase under the control of the human  
556 *IFNB1* promoter (500 ng). 24 h post transfection, SeV was inoculated at MOI 10.  
557 24 h post infection, the cells were harvested for Western blotting (top) and luciferase  
558 assay (bottom). For Western blotting, the input of cell lysate was normalized to TUBA,  
559 and one representative result out of X independent experiments is shown. The band  
560 of each viral protein is indicated by a white arrowhead. kDa, kilodalton. In the  
561 luciferase assay, the value of the SeV-infected empty vector-transfected cells was  
562 set to 100%. The average of three independent experiments with SEM is shown,  
563 and statistically significant differences ( $P < 0.05$ ) compared to the SeV-infected  
564 empty vector-transfected cells (#) and the same amount of the SARS-CoV-2 ORF3b-  
565 transfected cells (\*) are shown. E, empty vector.  
566 See also **Figure S1** and **Table S1**.

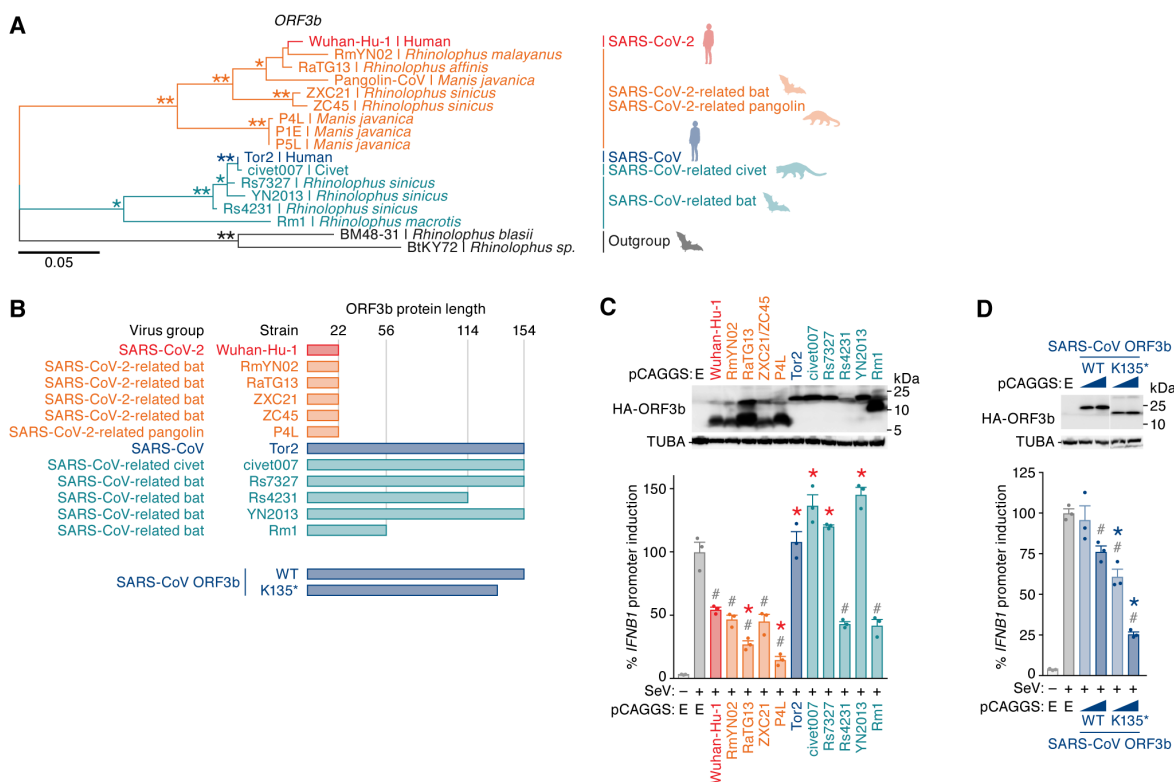

567

568 **Figure 2. C-terminal truncations increase the IFN-antagonistic activity of**  
 569 **ORF3b**

570 (A) Maximum likelihood phylogenetic tree of *Sarbecovirus* ORF3b. The ORF3b  
 571 sequences of SARS-CoV-2 (Wuhan-Hu-1), all reported SARS-CoV-2-related viruses  
 572 from bats (n=4) and pangolins (n=4), representatives of SARS-CoV (Tor2), SARS-  
 573 CoV-related viruses from civets (civet007) and bats (Rs7327, Rs4231, YN2013 and  
 574 Rm1), and two outgroup viruses (BM48-31 and BtKY72) were analyzed. Strain name  
 575 and host of each virus are indicated for each branch. Bootstrap value; \*, >80%; \*\*,  
 576 >95%.

577 (B) Illustration of protein lengths of all *Sarbecovirus* ORF3b isolates used in this  
 578 study (top) and the protein lengths of SARS-CoV ORF3b mutants (bottom).

579 (C) Anti-IFN-I activities of different *Sarbecovirus* ORF3b proteins. HEK293T cells  
 580 were cotransfected with a plasmid expressing one of 11 HA-tagged *Sarbecovirus*  
 581 ORF3b proteins (summarized in B; 100 ng) and p125Luc (500 ng). 24 h post  
 582 transfection, SeV was inoculated at MOI 10. 24 h post infection, cells were harvested  
 583 for Western blotting (top) and luciferase assay (bottom). Note that the amino acid  
 584 sequences of ZXC21 and ZC45 are identical.

585 (D) Anti-IFN-I activity of C-terminally truncated SARS-CoV ORF3b. HEK293T cells  
 586 were cotransfected with two different amounts of plasmids expressing HA-tagged  
 587 SARS-CoV ORF3b WT and K135\* (50 and 100 ng) and p125Luc (500 ng). 24 h post

588 transfection, SeV was inoculated at MOI 10. 24 h post infection, the cells were  
589 harvested for Western blotting (top) and luciferase assay (bottom).  
590 For Western blotting, the input of cell lysate was normalized to TUBA. One  
591 representative blot out of three independent experiments is shown. In the luciferase  
592 assay, the value of the SeV-infected empty vector-transfected cells was set to 100%.  
593 The average of three independent experiments with SEM is shown, and statistically  
594 significant differences ( $P < 0.05$ ) compared to the SeV-infected empty vector-  
595 transfected cells (#) and the same amount of either SARS-CoV-2 ORF3b (Wuhan-  
596 Hu-1)-transfected cells (\*, **C**) or SARS-CoV ORF3b WT-transfected cells (\*, **D**) are  
597 shown. E, empty vector.

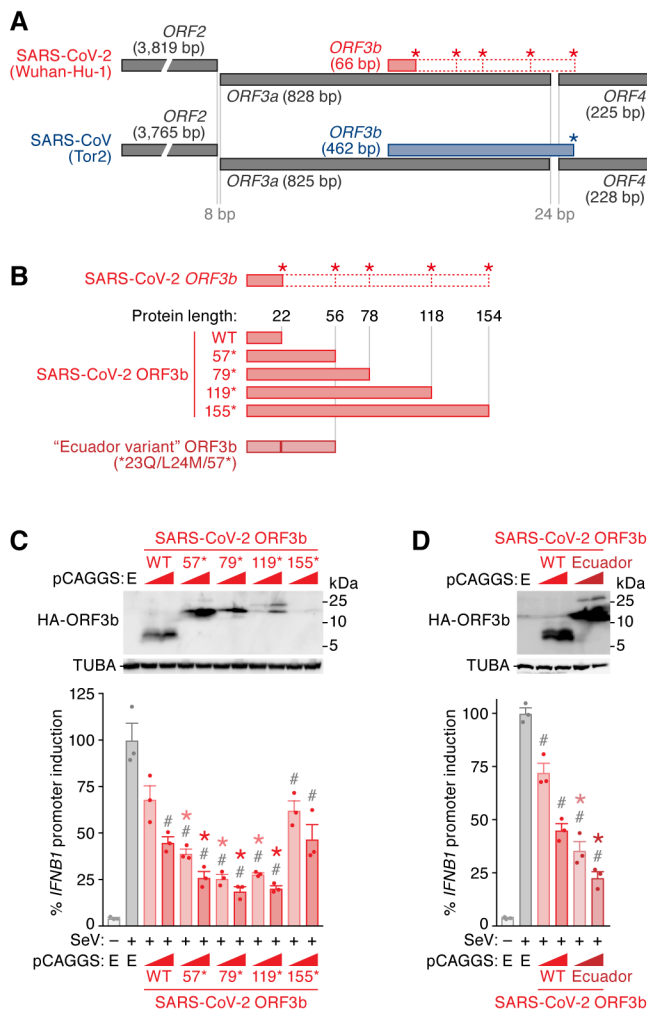

598

### 599 Figure 3. Enhanced anti-IFN-I upon reconstitution of the cryptic SARS-CoV-2 600 ORF3b

601 (A) Schemes illustrating the genomic regions encoding *ORF2*, *ORF3a*, *ORF3b* and  
602 *ORF4* of SARS-CoV-2 and SARS-CoV. Open squares with dotted red lines indicate  
603 a cryptic *ORF3b* reading frame in SARS-CoV-2 that is similar to SARS-CoV *ORF3b*.  
604 Asterisks indicate stop codons in the *ORF3b* frame.

605 (B) SARS-CoV-2 *ORF3b* derivatives characterized in this study. (Top) WT SARS-  
606 CoV-2 *ORF3b* as well as four derivatives with mutated stop codons (57\*, 79\*, 119\*  
607 and 155\*) are shown. Asterisks indicate the stop codons in the original *ORF3b* frame.  
608 (Bottom) A natural *ORF3b* variant detected in two sequences deposited in GISAID  
609 (accession IDs: EPI\_ISL\_422564 and EPI\_ISL\_422565; herein designated an  
610 "Ecuador variant") are shown.

611 (C) Anti-IFN-I activity different SARS-CoV-2 *ORF3b* derivatives. HEK293T cells  
612 were cotransfected with two different amounts of plasmids expressing the indicated  
613 HA-tagged SARS-CoV-2 *ORF3b* derivatives (WT, 57\*, 79\*, 119\* and 155\*; 50 and

614 100 ng) and p125Luc (500 ng). 24 h post transfection, SeV was inoculated at MOI  
615 10. 24 h post infection, the cells were harvested for Western blotting (top) and  
616 luciferase assay (bottom).

617 **(D)** Enhanced anti-IFN-I activity of an “Ecuador variant” ORF3b. HEK293T cells were  
618 cotransfected with two different amounts of plasmids expressing HA-tagged  
619 “Ecuador variant” ORF3b or parental SARS-CoV-2 ORF3b (50 and 100 ng) and  
620 p125Luc (500 ng). 24 h post transfection, SeV was inoculated at MOI 10. 24 h post  
621 infection, the cells were harvested for Western blotting (top) and luciferase assay  
622 (bottom).

623 For Western blotting, the input of cell lysate was normalized to TUBA. One  
624 representative blot out of three independent experiments is shown. A highly exposed  
625 blot visualizing the band of the 155\* mutant is shown in **Figure S2**. kDa, kilodalton.  
626 In the luciferase assay, the value of the SeV-infected empty vector-transfected cells  
627 was set to 100%. The average of three independent experiments with SEM is shown,  
628 and statistically significant differences ( $P < 0.05$ ) compared to the SeV-infected  
629 empty vector-transfected cells (#) and the same amount of the SARS-CoV-2 ORF3b  
630 WT-transfected cells (\*) are shown. E, empty vector.

631 See also **Figure S2**.
